# Supplementary material for: Predictors of Use and Outcomes of Mechanical Valve Replacement in the United States (2008–2017)
Source: PubMed Central journal article supplement — J Am Heart Assoc. 2021 Apr 19;10(9):e019929. doi: 10.1161/JAHA.120.019929 (PMC8200758; doi:10.1161/jaha.120.019929), 2021-04-19
Supplement: JAH3-10-e019929-s001.pdf [file JAH3-10-e019929-s001.pdf]

# **SUPPLEMENTAL MATERIAL**

**Table S1. List of the International Classification of Diseases Codes Used in the Study.**

|                                                        |                                                                                                                                                                                                                                                                                                                                                                                                                                                                                                                                                                                                                                                                                                                                                                                                                                                                                                                                                                                                                                                                                                     |
|--------------------------------------------------------|-----------------------------------------------------------------------------------------------------------------------------------------------------------------------------------------------------------------------------------------------------------------------------------------------------------------------------------------------------------------------------------------------------------------------------------------------------------------------------------------------------------------------------------------------------------------------------------------------------------------------------------------------------------------------------------------------------------------------------------------------------------------------------------------------------------------------------------------------------------------------------------------------------------------------------------------------------------------------------------------------------------------------------------------------------------------------------------------------------|
| <p><b>Mitral Valve Replacement</b></p>                 | <p><b>* Tissue valve replacement:</b><br/>           35.23 Open and other replacement of mitral valve with tissue graft<br/>           02RG07Z Replacement of Mitral Valve with Autologous Tissue Substitute, Open Approach<br/>           02RG08Z Replacement of Mitral Valve with Zooplastic Tissue, Open Approach<br/>           02RG0KZ Replacement of Mitral Valve with Nonautologous Tissue Substitute, Open Approach<br/> <b>* Mechanical valve replacement:</b><br/>           35.24 Open and other replacement of mitral valve<br/>           02RG0JZ Replacement of Mitral Valve with Synthetic Substitute, Open Approach</p>                                                                                                                                                                                                                                                                                                                                                                                                                                                             |
| <p><b>Aortic Valve Replacement</b></p>                 | <p><b>* Tissue valve replacement:</b><br/>           35.21 Replacement of aortic valve with tissue graft<br/>           02RF07Z Replacement of Aortic Valve with Autologous Tissue Substitute, Open Approach<br/>           02RF08Z Replacement of Aortic Valve with Zooplastic Tissue, Open Approach<br/>           02RF0KZ Replacement of Aortic Valve with Nonautologous Tissue Substitute, Open Approach<br/> <b>* Mechanical valve replacement:</b><br/>           35.22 Other replacement of aortic valve<br/>           02RF0JZ Replacement of Aortic Valve with Synthetic Substitute, Open Approach</p>                                                                                                                                                                                                                                                                                                                                                                                                                                                                                     |
| <p><b>Surgical Left Atrial Appendage Exclusion</b></p> | <p>ICD-9-CM 37.36<br/>           ICD-10-CM<br/>           02570ZK Destruction of Left Atrial Appendage, Open Approach<br/>           02B70ZK Excision of Left Atrial Appendage, Open Approach<br/>           02L70ZK Occlusion of Left Atrial Appendage, Open Approach<br/>           02L70CK Occlusion of left atrial appendage with extraluminal device, open</p>                                                                                                                                                                                                                                                                                                                                                                                                                                                                                                                                                                                                                                                                                                                                 |
| <p><b>Surgical MAZE</b></p>                            | <p>ICD-9-CM 37.33<br/>           ICD-10-CM<br/>           02570ZZ Destruction of Left Atrium, Open Approach<br/>           02B70ZZ Excision of Left Atrium, Open Approach<br/>           02574ZZ Destruction of Left Atrium, Percutaneous Endoscopic<br/>           02B74ZZ Excision of Left Atrium, Percutaneous Endoscopic Approach</p>                                                                                                                                                                                                                                                                                                                                                                                                                                                                                                                                                                                                                                                                                                                                                           |
| <p><b>Coronary Artery Bypass Grafting</b></p>          | <p><b>ICD-9-CM:</b> 3610, 3611, 3612, 3613, 3614, 3615, 3616, 3617, 3619<br/> <b>ICD-10-CM:</b> 02130KW, 02130Z3, 02130Z8, 02130Z9, 02130ZC, 02130ZF, 02130K8, 02130K9, 02130KC, 02130KF, 02130A9, 02130AC, 02130AF, 02130AW 02130J3, 02130J8 02130J9, 02130JC 02130JF, 02130JW 02130K3, 02120Z8, 02120Z9, 02120ZC, 02120ZF, 0213093, 0213098, 0213099, 021309C, 021309F, 021309W, 02130A3, 02130A8, 02120AW, 02120J3, 02120J8, 02120J9, 02120JC, 02120JF, 02120JW, 02120K3, 02120K8 02120K9, 02120KC 02120KF, 02120KW, 02120Z3, 02110Z9, 02110ZC, 02110ZF 0212093, 0212098, 0212099, 021209C, 021209F, 021209W, 02120A3, 02120A8, 02120A9, 02120AC 02120AF, 02110J3, 02110J8, 02110J9, 02110JC, 02110JF, 02110JW, 02110K3, 02110K8, 02110K9, 02110KC, 02110KF, 02110KW, 02110Z3, 02110Z8, 02100ZC 02100ZF 0211093 0211098, 0211099, 021109C, 021109F, 021109W, 02110A3, 02110A8, 02110A9, 02110AC, 02110AF, 02110AW, 02100J3, 02100K9, 02100KC, 02100KF, 02100KW, 02100Z3, 02100Z8, 02100Z9, 0210093, 0210099, 021009C, 021009F, 021009W, 02100A3, 02100A8, 02100A9, 02100AC, 02100AF, 02100AW</p> |

**Table S2. Utilization of Mechanical Prostheses Among Patients  $\leq 70$  years of age Undergoing Aortic or Mitral Valve Replacement Stratified by Age Group.**

| <b>Age Group</b> | <b>Valve</b> | <b>2008</b> | <b>2009</b> | <b>2010</b> | <b>2011</b> | <b>2012</b> | <b>2013</b> | <b>2014</b> | <b>2015</b> | <b>2016</b> | <b>2017</b> |
|------------------|--------------|-------------|-------------|-------------|-------------|-------------|-------------|-------------|-------------|-------------|-------------|
| <b>50-55</b>     | Aortic       | 59.8%       | 56.0%       | 57.3%       | 58.8%       | 58.5%       | 57.1%       | 53.1%       | 45.6%       | 36.2%       | 35.9%       |
|                  | Mitral       | 72.6%       | 69.7%       | 70.5%       | 63.9%       | 64.8%       | 70.5%       | 67.6%       | 62.2%       | 48.5%       | 47.9%       |
| <b>56-60</b>     | Aortic       | 51.5%       | 44.3%       | 47.0%       | 51.7%       | 48.0%       | 46.2%       | 45.1%       | 39.2%       | 23.4%       | 22.4%       |
|                  | Mitral       | 66.3%       | 58.1%       | 67.2%       | 64.7%       | 67.3%       | 58.3%       | 59.6%       | 56.4%       | 42.2%       | 36.8%       |
| <b>61-65</b>     | Aortic       | 43.4%       | 37.0%       | 39.2%       | 37.5%       | 39.8%       | 37.5%       | 35.6%       | 31.0%       | 17.5%       | 14.5%       |
|                  | Mitral       | 54.9%       | 51.3%       | 53.8%       | 51.7%       | 51.5%       | 54.8%       | 45.5%       | 44.8%       | 28.8%       | 25.6%       |
| <b>66-70</b>     | Aortic       | 33.6%       | 32.2%       | 33.3%       | 33.3%       | 32.9%       | 32.0%       | 30.5%       | 24.2%       | 12.9%       | 9.4%        |
|                  | Mitral       | 46.7%       | 42.4%       | 43.6%       | 41.8%       | 41.4%       | 40.3%       | 36.1%       | 33.0%       | 20.5%       | 18.1%       |

**Table S3. Predictors of Utilization of Mechanical Prostheses Among Patients Undergoing Aortic Valve Replacement (Univariate Logistical Regression).**

| Variables                                      | Odd Ratio | 95% CI    |           | P-value   |
|------------------------------------------------|-----------|-----------|-----------|-----------|
|                                                |           | Lower     | Upper     |           |
| Age                                            |           |           |           |           |
| 50-55                                          | Reference | Reference | Reference | Reference |
| 56-60                                          | 0.65      | 0.64      | 0.67      | <0.001    |
| 61-65                                          | 0.45      | 0.44      | 0.46      | <0.001    |
| 66-70                                          | 0.33      | 0.33      | 0.34      | <0.001    |
| Female                                         | 1.06      | 1.04      | 1.08      | <0.001    |
| Race                                           |           |           |           |           |
| White                                          | Reference | Reference | Reference | Reference |
| Black                                          | 1.29      | 1.25      | 1.33      | <0.001    |
| Hispanic                                       | 1.29      | 1.25      | 1.33      | <0.001    |
| Diabetes                                       | 0.82      | 0.81      | 0.84      | <0.001    |
| Hypertension                                   | 0.88      | 0.86      | 0.89      | <0.001    |
| Congestive Heart Failure                       | 0.47      | 0.45      | 0.48      | <0.001    |
| Peripheral Vascular Disease                    | 1.12      | 1.10      | 1.14      | <0.001    |
| Carotid Artery Disease                         | 0.75      | 0.71      | 0.78      | <0.001    |
| Chronic Kidney Disease                         | 1.11      | 1.08      | 1.14      | <0.001    |
| Chronic Lung Disease                           | 1.03      | 1.01      | 1.05      | 0.003     |
| Anemia                                         | 1.05      | 1.02      | 1.07      | <0.001    |
| Liver Disease                                  | 0.84      | 0.78      | 0.92      | <0.001    |
| Atrial Fibrillation                            | 0.86      | 0.84      | 0.87      | <0.001    |
| Conduction Disorders                           | 0.89      | 0.86      | 0.93      | <0.001    |
| Prior Defibrillator                            | 1.40      | 1.27      | 1.55      | <0.001    |
| Prior Sternotomy                               | 1.42      | 1.37      | 1.47      | <0.001    |
| Prior Stroke                                   | 0.91      | 0.87      | 0.94      | <0.001    |
| Non-Elective                                   | 1.10      | 1.08      | 1.12      | <0.001    |
| Teaching Hospital                              | 0.72      | 0.70      | 0.73      | <0.001    |
| Median Household Income                        |           |           |           |           |
| 0-25 <sup>th</sup> percentile                  | Reference | Reference | Reference | Reference |
| 26 <sup>th</sup> -50 <sup>th</sup> percentile  | 0.89      | 0.87      | 0.91      | <0.001    |
| 51 <sup>st</sup> -75 <sup>th</sup> percentile  | 0.83      | 0.81      | 0.85      | <0.001    |
| 76 <sup>th</sup> -100 <sup>th</sup> percentile | 0.70      | 0.68      | 0.71      | <0.001    |
| Hospital Region                                |           |           |           |           |
| Northeast                                      | Reference | Reference | Reference | Reference |
| Midwest                                        | 1.43      | 1.39      | 1.46      | <0.001    |
| South                                          | 1.73      | 1.69      | 1.77      | <0.001    |
| West                                           | 1.40      | 1.36      | 1.44      | <0.001    |
| Rural location                                 | 1.34      | 1.27      | 1.41      | <0.001    |
| Coronary Bypass Grafting                       | 0.93      | 0.92      | 0.95      | <0.001    |
| Bicuspid Aortic Valve                          | 0.78      | 0.76      | 0.79      | <0.001    |

**Table S4. Predictors of Utilization of Mechanical Prostheses Among Patients Undergoing Aortic Valve Replacement (Multivariable Logistic Regression) After Removing Atrial Fibrillation from the Model.**

| Variables                                      | Odd Ratio | 95% CI    |           | P-value   |
|------------------------------------------------|-----------|-----------|-----------|-----------|
|                                                |           | Lower     | Upper     |           |
| Age                                            |           |           |           |           |
| 50-55                                          | Reference | Reference | Reference | Reference |
| 56-60                                          | 0.64      | 0.62      | 0.66      | <0.001    |
| 61-65                                          | 0.43      | 0.42      | 0.44      | <0.001    |
| 66-70                                          | 0.31      | 0.30      | 0.32      | <0.001    |
| Female                                         | 1.10      | 1.08      | 1.12      | <0.001    |
| Race                                           |           |           |           |           |
| White                                          | Reference | Reference | Reference | Reference |
| Black                                          | 1.09      | 1.05      | 1.13      | <0.001    |
| Hispanic                                       | 1.19      | 1.15      | 1.23      | <0.001    |
| Diabetes                                       | 0.88      | 0.87      | 0.90      | <0.001    |
| Hypertension                                   | 0.96      | 0.94      | 0.97      | <0.001    |
| Congestive Heart Failure                       | 0.46      | 0.45      | 0.48      | <0.001    |
| Peripheral Vascular Disease                    | 1.13      | 1.11      | 1.16      | <0.001    |
| Carotid Artery Disease                         | 0.80      | 0.76      | 0.84      | <0.001    |
| Chronic Kidney Disease                         | 0.98      | 0.96      | 1.01      | 0.25      |
| Chronic Lung Disease                           | 1.00      | 0.98      | 1.02      | 0.87      |
| Anemia                                         | 1.01      | 0.99      | 1.03      | 0.42      |
| Liver Disease                                  | 0.79      | 0.72      | 0.86      | <0.001    |
| Conduction Disorders                           | 0.98      | 0.94      | 1.02      | 0.35      |
| Prior Defibrillator                            | 1.27      | 1.14      | 1.40      | <0.001    |
| Prior Sternotomy                               | 1.52      | 1.46      | 1.58      | <0.001    |
| Prior Stroke                                   | 0.92      | 0.89      | 0.96      | <0.001    |
| Non-Elective                                   | 1.06      | 1.04      | 1.08      | <0.001    |
| Teaching Hospital                              | 0.77      | 0.76      | 0.79      | <0.001    |
| Median Household Income                        |           |           |           |           |
| 0-25 <sup>th</sup> percentile                  | Reference | Reference | Reference | Reference |
| 26 <sup>th</sup> -50 <sup>th</sup> percentile  | 0.95      | 0.93      | 0.98      | <0.001    |
| 51 <sup>st</sup> -75 <sup>th</sup> percentile  | 0.92      | 0.90      | 0.95      | <0.001    |
| 76 <sup>th</sup> -100 <sup>th</sup> percentile | 0.82      | 0.80      | 0.84      | <0.001    |
| Hospital Region                                |           |           |           |           |
| Northeast                                      | Reference | Reference | Reference | Reference |
| Midwest                                        | 1.36      | 1.33      | 1.40      | <0.001    |
| South                                          | 1.61      | 1.57      | 1.65      | <0.001    |
| West                                           | 1.29      | 1.25      | 1.33      | <0.001    |
| Rural location                                 | 1.09      | 1.03      | 1.15      | <0.001    |
| Coronary Bypass Grafting                       | 1.01      | 1.00      | 1.03      | 0.15      |
| Bicuspid Aortic Valve                          | 0.68      | 0.66      | 0.69      | <0.001    |

**Table S5. Predictors of Utilization of Mechanical Prostheses Among Patients Undergoing Mitral Valve Replacement (Univariate Logistical Regression).**

| Variables                                      | Odd Ratio | 95% CI    |           | P-value   |
|------------------------------------------------|-----------|-----------|-----------|-----------|
|                                                |           | Lower     | Upper     |           |
| Age                                            |           |           |           |           |
| 50-55                                          | Reference | Reference | Reference | Reference |
| 56-60                                          | 0.74      | 0.70      | 0.78      | <0.001    |
| 61-65                                          | 0.47      | 0.45      | 0.49      | <0.001    |
| 66-70                                          | 0.30      | 0.29      | 0.32      | <0.001    |
| Female                                         | 1.07      | 1.04      | 1.10      | 0.046     |
| Race                                           |           |           |           |           |
| White                                          | Reference | Reference | Reference | Reference |
| Black                                          | 0.97      | 0.93      | 1.02      | <0.001    |
| Hispanic                                       | 1.16      | 1.09      | 1.23      | 0.21      |
| Diabetes                                       | 0.79      | 0.76      | 0.82      | <0.001    |
| Hypertension                                   | 0.83      | 0.80      | 0.85      | <0.001    |
| Congestive Heart Failure                       | 0.47      | 0.45      | 0.49      | <0.001    |
| Peripheral Vascular Disease                    | 0.69      | 0.65      | 0.72      | <0.001    |
| Carotid Artery Disease                         | 0.68      | 0.61      | 0.76      | <0.001    |
| Chronic Kidney Disease                         | 0.72      | 0.69      | 0.75      | <0.001    |
| Chronic Lung Disease                           | 0.90      | 0.87      | 0.93      | <0.001    |
| Anemia                                         | 1.04      | 1.00      | 1.08      | 0.06      |
| Liver Disease                                  | 0.77      | 0.68      | 0.88      | <0.001    |
| Atrial Fibrillation                            | 1.15      | 1.12      | 1.20      | <0.001    |
| Conduction Disorders                           | 0.87      | 0.80      | 0.94      | 0.001     |
| Prior Defibrillator                            | 1.26      | 1.12      | 1.42      | <0.001    |
| Prior Sternotomy                               | 1.09      | 1.03      | 1.16      | 0.004     |
| Prior Stroke                                   | 1.09      | 1.03      | 1.16      | 0.004     |
| Non-Elective                                   | 0.87      | 0.84      | 0.90      | <0.001    |
| Teaching Hospital                              | 0.78      | 0.75      | 0.81      | <0.001    |
| Median Household Income                        |           |           |           |           |
| 0-25 <sup>th</sup> percentile                  | Reference | Reference | Reference | Reference |
| 26 <sup>th</sup> -50 <sup>th</sup> percentile  | 0.94      | 0.91      | 0.98      | 0.006     |
| 51 <sup>st</sup> -75 <sup>th</sup> percentile  | 0.93      | 0.89      | 0.97      | <0.001    |
| 76 <sup>th</sup> -100 <sup>th</sup> percentile | 0.73      | 0.70      | 0.76      | <0.001    |
| Hospital Region                                |           |           |           |           |
| Northeast                                      | Reference | Reference | Reference | Reference |
| Midwest                                        | 1.14      | 1.09      | 1.20      | <0.001    |
| South                                          | 1.32      | 1.26      | 1.38      | <0.001    |
| West                                           | 1.31      | 1.25      | 1.38      | <0.001    |
| Rural location                                 | 1.19      | 1.08      | 1.31      | <0.001    |
| Coronary Bypass Grafting                       | 0.80      | 0.78      | 0.83      | <0.001    |
| Bicuspid Aortic Valve                          | 0.93      | 0.90      | 0.97      | <0.001    |

**Table S6. Predictors of Utilization of Mechanical Prostheses Among Patients Undergoing Mitral Valve Replacement (Multivariable Logistic Regression) After Removing Atrial Fibrillation from the Model.**

| Variables                                      | Odd Ratio | 95% CI    |           | P-value   |
|------------------------------------------------|-----------|-----------|-----------|-----------|
|                                                |           | Lower     | Upper     |           |
| Age                                            |           |           |           |           |
| 50-55                                          | Reference | Reference | Reference | Reference |
| 56-60                                          | 0.76      | 0.72      | 0.80      | <0.001    |
| 61-65                                          | 0.48      | 0.46      | 0.50      | <0.001    |
| 66-70                                          | 0.31      | 0.30      | 0.33      | <0.001    |
| Female                                         | 1.03      | 1.00      | 1.07      | 0.07      |
| Race                                           |           |           |           |           |
| White                                          | Reference | Reference | Reference | Reference |
| Black                                          | 0.87      | 0.83      | 0.91      | <0.001    |
| Hispanic                                       | 1.04      | 0.98      | 1.11      | 0.23      |
| Diabetes                                       | 0.92      | 0.89      | 0.95      | <0.001    |
| Hypertension                                   | 0.94      | 0.91      | 0.97      | <0.001    |
| Congestive Heart Failure                       | 0.50      | 0.47      | 0.52      | <0.001    |
| Peripheral Vascular Disease                    | 0.77      | 0.73      | 0.82      | <0.001    |
| Carotid Artery Disease                         | 0.86      | 0.77      | 0.96      | 0.01      |
| Chronic Kidney Disease                         | 0.87      | 0.83      | 0.91      | <0.001    |
| Chronic Lung Disease                           | 0.88      | 0.85      | 0.91      | <0.001    |
| Anemia                                         | 0.99      | 0.95      | 1.03      | 0.58      |
| Liver Disease                                  | 0.80      | 0.70      | 0.92      | <0.001    |
| Conduction Disorders                           | 1.02      | 0.93      | 1.11      | 0.73      |
| Prior Defibrillator                            | 1.13      | 1.00      | 1.28      | 0.06      |
| Prior Sternotomy                               | 1.24      | 1.16      | 1.32      | <0.001    |
| Prior Stroke                                   | 1.12      | 1.05      | 1.19      | <0.001    |
| Non-Elective                                   | 0.94      | 0.91      | 0.97      | <0.001    |
| Teaching Hospital                              | 0.82      | 0.79      | 0.86      | <0.001    |
| Median Household Income                        |           |           |           |           |
| 0-25 <sup>th</sup> percentile                  | Reference | Reference | Reference | Reference |
| 26 <sup>th</sup> -50 <sup>th</sup> percentile  | 0.95      | 0.91      | 0.99      | 0.02      |
| 51 <sup>st</sup> -75 <sup>th</sup> percentile  | 0.94      | 0.90      | 0.99      | 0.01      |
| 76 <sup>th</sup> -100 <sup>th</sup> percentile | 0.76      | 0.72      | 0.79      | <0.001    |
| Hospital Region                                |           |           |           |           |
| Northeast                                      | Reference | Reference | Reference | Reference |
| Midwest                                        | 1.04      | 0.99      | 1.09      | 0.13      |
| South                                          | 1.25      | 1.19      | 1.31      | <0.001    |
| West                                           | 1.22      | 1.16      | 1.29      | <0.001    |
| Rural location                                 | 0.98      | 0.88      | 1.09      | 0.73      |
| Coronary Bypass Grafting                       | 0.94      | 0.91      | 0.98      | <0.001    |
| Surgical MAZE/LAA                              | 0.93      | 0.89      | 0.96      | <0.001    |
| Mitral Stenosis                                | 1.30      | 1.24      | 1.36      | <0.001    |
